# Supplementary material
Source: publisher site journal article supplement (https://www.dovepress.com/article/536132)
Supplement: Supplementary file 1 [file Supporting%20information.docx]

Supporting information

FigureS1 Synergistic effects of enrofloxacin and colistin.


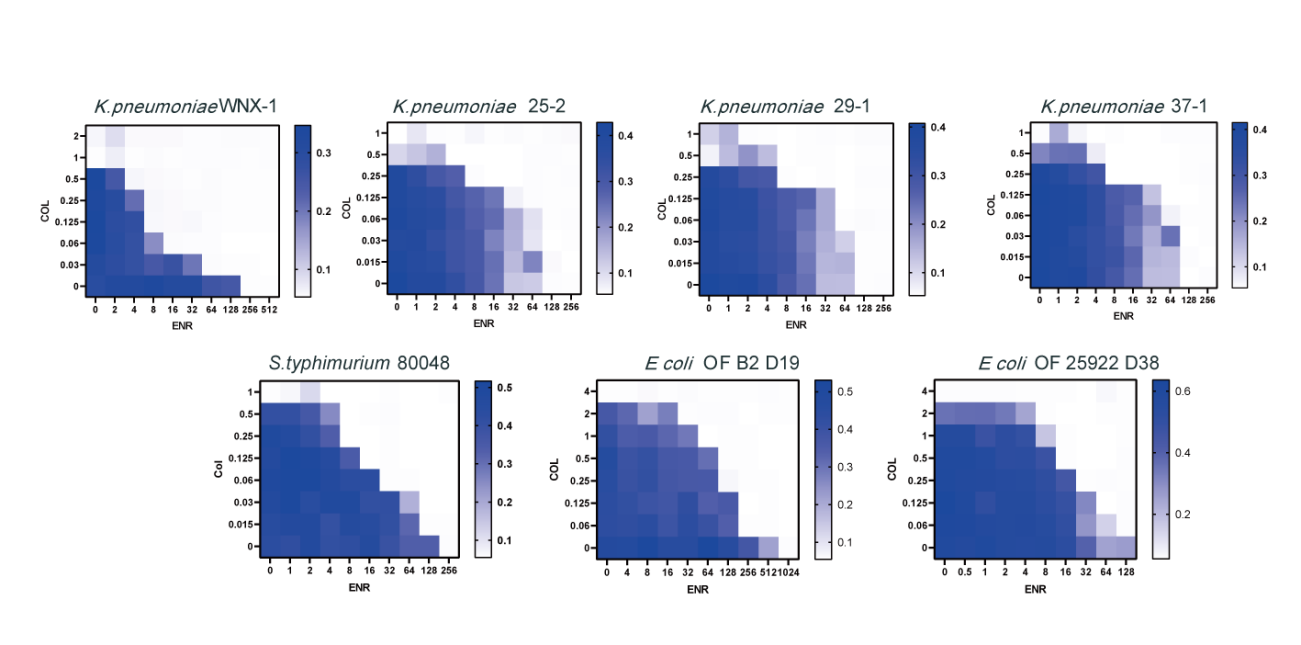


Figure S2 Bactericidal curves of single and compound combinations of enrofloxacin and colistin (*Klebsiella pneumoniae* WNX-1).


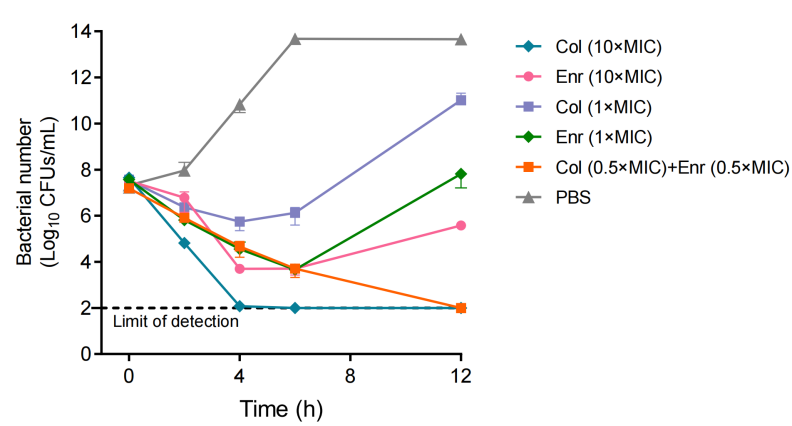


Figure S3 HPLC spectrum of enrofloxacin (A) and colistin (B).

HPLC method for the determination of colistin as below. The chromatographic separation was performed on a Waters XBridge Peptide BEH C18 column (300 Å, 5 µm, 4.6 mm × 250 mm) at 28°C. The mobile phase (78:22, v/v) comprised aqueous phase A (pH 3.0; 7.1 g sodium sulfite, 1.1 mL phosphoric acid, 2.3 mL acetic acid, 4.0 mL triethylamine in 1 L water) and acetonitrile (phase B), delivered isocratically at 1.0 mL/min. Colistin quantification utilized UV detection (206 nm) with 20 μL injections, validated for linearity (200–6000 ppm). Samples were diluted in mobile phase.


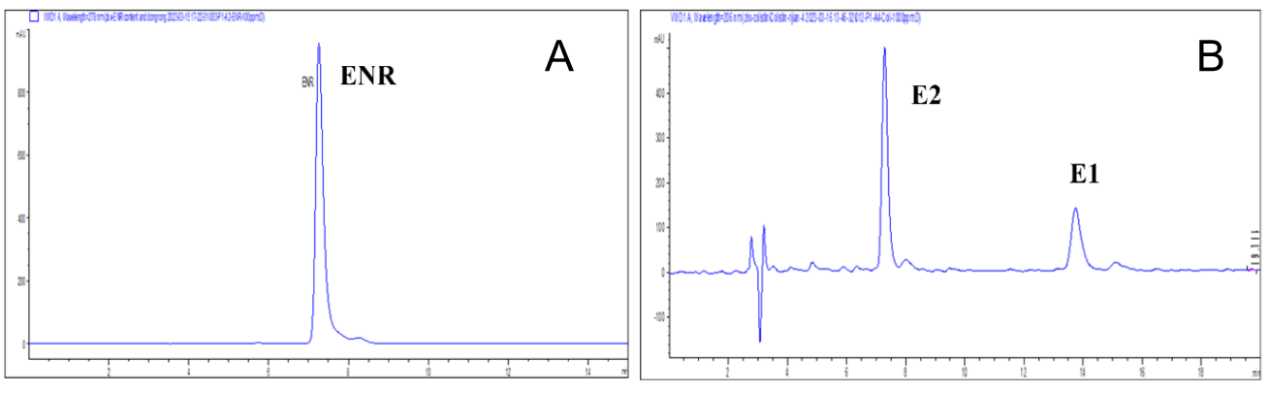


**Table S1 UV-Vis Spectroscopy Conditions**

| Parameter | Condition |
| --- | --- |
| Solvent for enrofloxacin | Water |
| Solvent for enrofloxacin sodium | 40% 1,2-Propanediol |
| Final concentration | 10 μg/mL |
| Volume per well | 200 μL |
| Plate type | 96-well quartz plate |
| Wavelength range | 230–800 nm |

**Table S2 1H NMR Spectroscopy Parameters**

| Parameter | Setting |
| --- | --- |
| Instrument | JNM-ECZ400S NMR system (JEOL, Japan) |
| Temperature | 20 °C |
| Acquisition time | 2.1863 s |
| Relaxation delay | 5.0000 s |
| Number of scans | 8 |
| Receiver gain | 26.0 |
| Pulse width | 3.1250 μs |
| Spectral width | 5995.2 Hz |
| Minimum frequency | 998.6 Hz |

**Table S3 Computational Chemistry Parameters**

| Step / Method | Details |
| --- | --- |
| Conformation Search | Molclus + MOPAC v22.0.4, PM6-DH+ method |
| Geometry Optimization and Frequency Analysis | Gaussian 09, B3LYP-D3BJ, 6-31G* basis set |
| Binding Energy Calculations | Gaussian 09, M06-2X functional, ma-def2-TZVP basis set |
| Weak Interaction Analysis | IGMH analysis with Multiwfn 3.8 |
| Visualization | VMD software |

**Table S4 Fractional inhibitory concentration index (FICI) of enrofloxacin and colistin.**

| Strains | MIC of ENR (µg/mL) | | MIC of Col (µg/mL) | |  |
| --- | --- | --- | --- | --- | --- |
| Alone | Combination | Alone | Combination | FICI |
| *Klebsiella pneumoniae* | | | | | |
| WNX-1 | 256 | 16 | 1 | 0.06 | 0.1225 |
| 37-1 | 128 | 8 | 1 | 0.25 | 0.3125 |
| 29-1 | 128 | 8 | 2 | 0.25 | 0.1875 |
| 25-2 | 128 | 8 | 2 | 0.25 | 0.1875 |
| *Escherichia coli* | | | | | |
| OF B2 D19 | 1024 | 128 | 4 | 0.25 | 0.1875 |
| OF 25922 D38 | 256 | 16 | 4 | 0.5 | 0.1875 |
| *Actinobacillus pleuropneumoniae* | | | | | |
| Hang 8 | 0.015 | 0.0009 | 1 | 0.5 | 0.56 |
| *Staphylococcus aureus* | | | | | |
| T144 | 4 | 2 | 512 | 128 | 0.75 |
| *Salmonella* | | | | | |
| 80048 | 256 | 32 | 1 | 0.06 | 0.185 |
| *Pasteurella multocida* | | | | | |
| P32 D7 | 32 | 4 | 1 | 0.25 | 0.375 |

**Table S5** Crystallization in accelerated stability test at 4℃

| Group | 0d | 30d | 60d | 90d | 180d |
| --- | --- | --- | --- | --- | --- |
| 1 | － | ＋＋ | ＋＋ | ＋＋＋ | ＋＋＋ |
| 2 | － | － | ＋ | ＋＋ | ＋＋＋ |
| 3 | － | ＋＋ | ＋＋＋ | ＋＋＋ | ＋＋＋ |
| 4 | － | ＋＋ | ＋＋ | ＋＋ | ＋＋＋ |
| 5 | － | － | － | ＋＋ | ＋＋＋ |
| 6 | － | － | － | － | － |
| 7 | － | － | ＋ | ＋ | ＋＋ |
| 8 | － | － | ＋ | ＋ | ＋＋＋ |
| 9 | － | － | ＋ | ＋ | ＋＋ |

−: No crystal precipitation observed; +: Minor crystal precipitation; ++: Moderate crystal precipitation; +++: Significant crystal precipitation.

**Table S6** content of colistin and enroxacin

| Storage conditions | | Content to labeling ratio | | |
| --- | --- | --- | --- | --- |
| Time (month) | Temperature (℃) | E2 (IU/mL) | E1 (IU/mL) | ENR (μg/mL) |
| 10 | 30 | 218355.97 ± 7481.75 (87.34%) | 225355.5 ± 118066.9 (90.14%) | 26.65 ± 1.72 (106.60%) |
| 10 | 4 | 248544.61 ± 9102.77 (99.42%) | 241250.93 ± 1477.81 (96.50%) | 26.08 ± 0.63 (104.32%) |
